# Flies getting filthy: The precopulatory mating behaviours of three mud-dwelling species of Australian *Lispe* (Diptera: Muscidae)

Nathan J. Butterworth<sup>1\*</sup> and James F. Wallman<sup>2</sup>

ORCID ID: 0000-0002-5679-2700

<sup>1</sup>School of Life Sciences, University of Technology Sydney, Ultimo NSW 2007, Australia

<sup>2</sup>Faculty of Science, University of Technology Sydney, Ultimo NSW 2007, Australia

Running title: Courtship of Australian *Lispe* species

Corresponding author: [nathan.butterworth@uts.edu.au](mailto:nathan.butterworth@uts.edu.au)

**Acknowledgements** – The authors thank Adrian Pont for his helpful comments and guidance with taxonomic identification, Kathryn Doty for her assistance in the field, and Penelope Butterworth for her continuous support.

1    **Abstract** – *Lispe* (Diptera: Muscidae) is a cosmopolitan genus of predatory flies that inhabit  
2    the muddy and sandy surrounds of water bodies. There are more than 163 described species  
3    worldwide, many of which are known to exhibit cursorial courtship displays which involve  
4    complex visual and vibratory signals. Despite the widespread distribution of these flies and  
5    their remarkable courtship displays, the biology and behaviour of most species are entirely  
6    unknown. Here, for the first time, we describe the pre-copulatory mating behaviours of three  
7    widespread and common Australian species: *Lispe sydneyensis*, *Lispe albimaculata* and *Lispe*  
8    *xenochaeta*. We demonstrate that all three species exhibit entirely unique courtship displays,  
9    consisting of complex behavioural repertoires. Importantly, we highlight intrasexual  
10   competition in *L. sydneyensis*, where males engage in competitive dances and combat. We  
11   also report female-male aggression in *L. albimaculata* and *L. xenochaeta* where females  
12   charge and display towards males. These novel mating systems provide unique opportunities  
13   to test ecological and evolutionary hypotheses.

14   **Key Words** – Diptera, Courtship, Sexual selection, Muscidae, Behaviour

15

16

17

18

19

20

21

22

23

24

25

26

27

28

## 29 INTRODUCTION

30 The dipteran clade Calyptratae is incredibly diverse with more than 18,000 described species,  
31 including some of the most well-known flies such as house flies, blow flies, flesh flies, and  
32 bot flies (Kutty et al. 2010). These flies express an astounding variety of complex sexual  
33 behaviours including the sensual dances of the waltzing blowfly *Chrysomya flavifrons*  
34 (Calliphoridae) (Butterworth et al. 2019), the high-speed courtship flights of the lesser house  
35 fly *Fannia canicularis* (Muscidae) (Land and Collett 1974), and the flashy mating displays of  
36 the satellite fly *Phrosinella aurifacies* (Sarcophagidae) (Spofford and Kurczewski 1985).  
37 However, one particular genus of muscid flies – *Lispe* – has taken these sexual innovations to  
38 the extreme.

39 *Lispe* is a cosmopolitan genus of flies which inhabit open sandy or muddy substrates  
40 surrounding puddles, creeks, rivers, lakes, and beaches (Werner and Pont 2006; Zhang et al.  
41 2013; Fogaça and de Carvalho 2018). The group is characterised by the enlarged facial palps,  
42 which have been adapted for sexual signalling in some species (White et al. 2020a). There are  
43 more than 163 species worldwide (Pont 2019) all of which appear to be predators and  
44 scavengers of small invertebrates or their remains (Werner and Pont 2006; Vikhrev 2011).  
45 Most species seem to exhibit unique and complex courtship displays, such as the circular  
46 cavorting of *Lispe tentaculata* along the muddy banks of rivers in Europe (Frantsevich and  
47 Gorb 2006), or the iridescent face-to-face dances of *Lispe cana* along the coastal beaches of  
48 Australia (White et al. 2020a; White et al. 2020b). Australia is home to at least 39 species of  
49 *Lispe* (Pont 2019), which due to their widespread abundance and diverse behaviours have  
50 exceptional potential as models for testing ecological and evolutionary hypotheses (White et  
51 al. 2020b).

52 Despite their unique ecologies and mating systems, the biology of almost all Australian *Lispe*  
53 species (besides *L. cana*) remains entirely unknown (Pont 2019). Here, for the first time, we  
54 report the diverse courtship behaviours of three mud-dwelling Australian species: *Lispe*  
55 *sydneyensis*, *Lispe albimaculata* and *Lispe xenochaeta*. These species provide unique  
56 opportunities for field studies of evolution and behaviour because they are common and  
57 broadly distributed throughout Australia, exhibit remarkably diverse mating systems, and are  
58 easy to observe and film.

59

60

61 METHODS

62 *Field site* Filming was conducted between the 6<sup>th</sup> and 12<sup>th</sup> of September 2020 around muddy  
63 pools along a sandy track in Huskisson, NSW Australia (35°02'59.0"S 150°40'07.4"E)  
64 (Figure 1). All observations were made between 10:00 and 15:00 under natural light and  
65 temperature conditions (temperature min: 17.8°C, max: 21.0°C, mean: 19.4°C). The last  
66 period of substantial rain (daily amounts exceeding 10 mm) was between the 8<sup>th</sup> and 10<sup>th</sup>  
67 August, and as such the bodies of water must have been present for several weeks prior to  
68 observation and were inundated with frog and mosquito larvae.

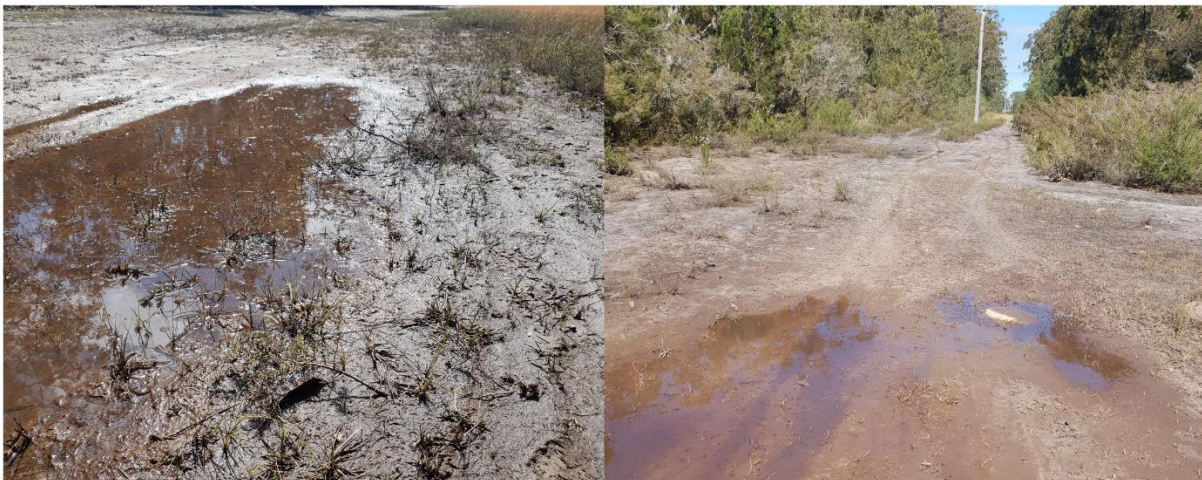

69

70 **Figure 1.** Muddy site where observations were made. Water had been present for  
71 approximately 2-3 weeks and was inundated with frog and mosquito larvae. Both *L.*  
72 *sydneyensis* and *L. albimaculata* were in high abundance (~50-100 individuals at any time),  
73 while *L. xenochaeta* were less frequently observed (only 1-2 individuals at any time).

74 *Insect identification* To identify species and correctly assign courtship behaviours, for each  
75 species between two and four courting pairs were captured and euthanised. Taxonomic  
76 identification followed the taxonomic key of Pont (2019) alongside comparison with museum  
77 specimens from the Australian National Insect Collection (ANIC). Three species were  
78 identified (Figure 2).



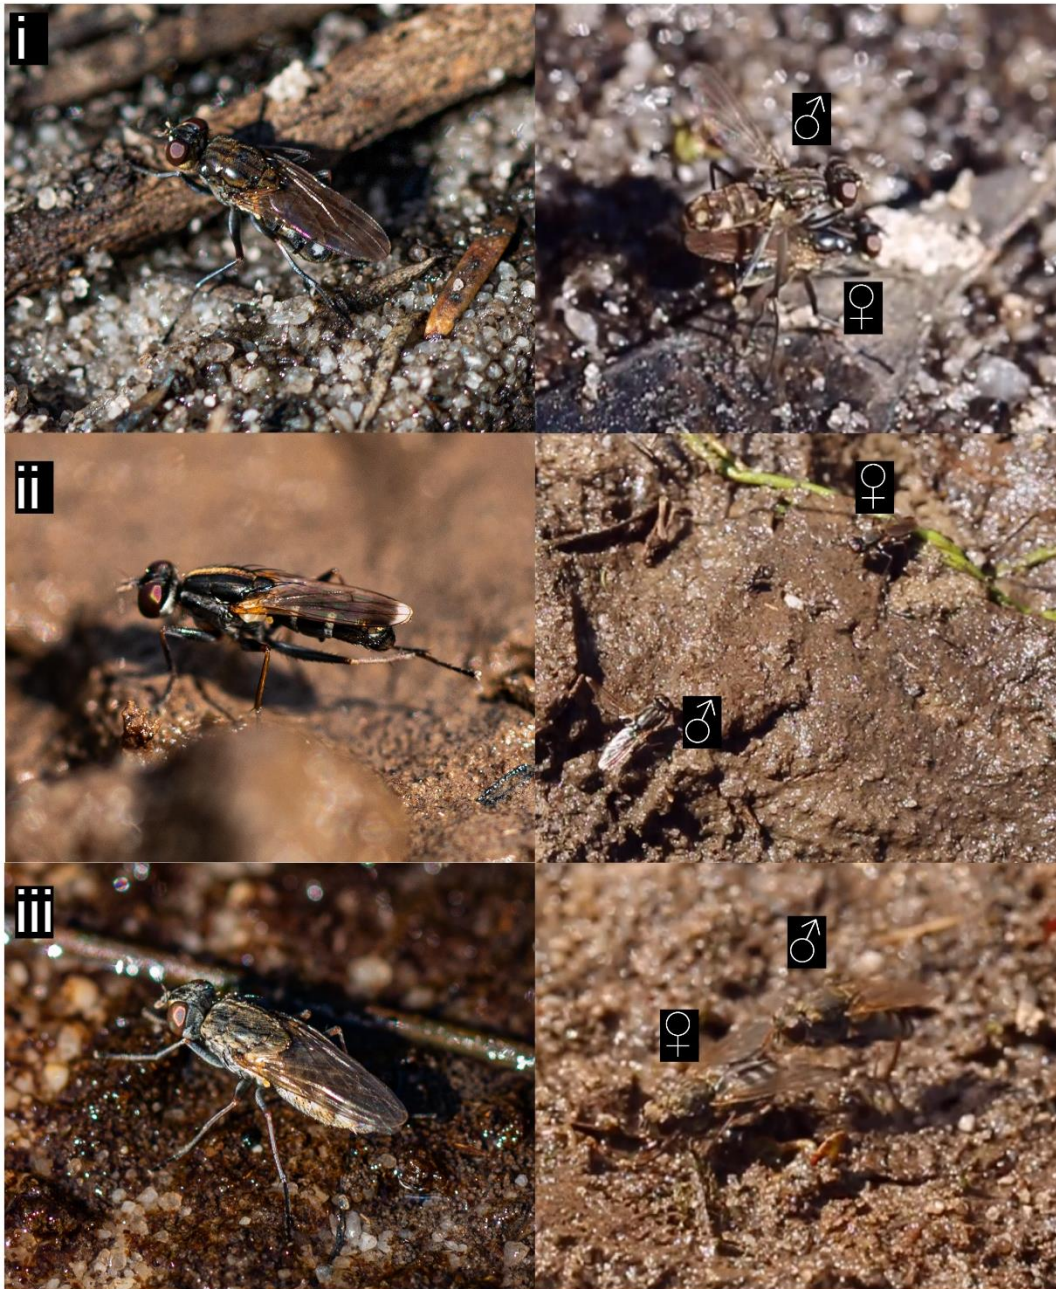

79

80 **Figure 2.** The three species of Australian *Lyspe* found courting around the muddy pool.  
81 Pictured are (i) *L. sydneyensis* and a male ‘straddling’ a female, (ii) *L. albimaculata* and a  
82 male ‘wing-revealing’ towards a female, and (iii) *L. xenochaeta* and a male ‘holding’ a  
83 female. Photos were taken with a Canon 70D DSLR camera with a Canon EF 100mm f/2.8L  
84 lens. Photos credited to Nathan Butterworth.

85

86

87

88

89 *Behavioural observations* Conspecific interactions (male-female, female-male, and male-  
90 male) were recorded with a Canon 70D DSLR camera with a Canon EF 100mm f/2.8L lens.  
91 Filming continued until one or both flies left the area and could no longer be observed. Once  
92 video footage was obtained, slow-motion playback with Adobe Premiere Pro allowed us to  
93 describe all inter- and intra-sexual interactions.

## 94 RESULTS

95 A total of 57 individual interactions were recorded across the three species. For *L.*  
96 *sydneyensis* we recorded thirty-nine interactions, for *L. albimaculata* we recorded sixteen  
97 interactions, and for *L. xenochaeta* we recorded two interactions. From this footage, we were  
98 able to describe the behaviours expressed by these species during courtship. For video  
99 footage of each of the behaviours, refer to Supplementary Materials 1-3.

### 100 The straddling mud fly, *Lispe sydneyensis*

101 This was the most common species at the site. Notably, *L. sydneyensis* males have greatly  
102 elongated mid-legs (Figure 3.i), which allows them to position their entire body atop the back  
103 of the female and to remain in this position as the female moves around (Fig 2.i). The species  
104 also has iridescent markings on the head and palps which may be involved in courtship  
105 (Figure 3.ii). The male courtship display is complex, involving several discrete behaviours  
106 (Table 1; Supplementary Material 1). In sequential order, the male ‘orients’ towards the  
107 female, until he is within ~5 mm, at which point he rapidly encircles her while waving his  
108 mid-legs. He then makes a few ‘straddle-strikes’ onto the back of the female, before  
109 committing to the final straddling position. While ‘straddling’, the male vigorously vibrates  
110 his wings and strokes the head and wings of the female with his fore- and hind-legs,  
111 respectively. Females seem unaffected by these behaviours, and continue to explore, preen  
112 themselves, and feed on surrounding matter. After a certain period of ‘straddling’, the male  
113 attempts copulation with the female, although we only observed this on one occasion. We did  
114 not observe any female-specific mating behaviours or responses to male mating attempts.  
115 However, there is clearly intense male-male competition for females. We observed numerous  
116 encounters between males, where they approach each other while rapidly moving their bodies  
117 up and down (‘bopping’), and in some cases waving their mid-legs. If neither male concedes,  
118 this often leads to a frontal attack with the proboscis, usually resulting in a brief tug-of-war  
119 between the two.

120

121  
122  
123  
124  
125  
126  
127  
128  
129  
130  
131  
132  
133  
134  
135  
136  
137  
138  
139  
140  
141  
142  
143  
144  
145  
146  
147  
148  
149  
150  
151  
152  
153

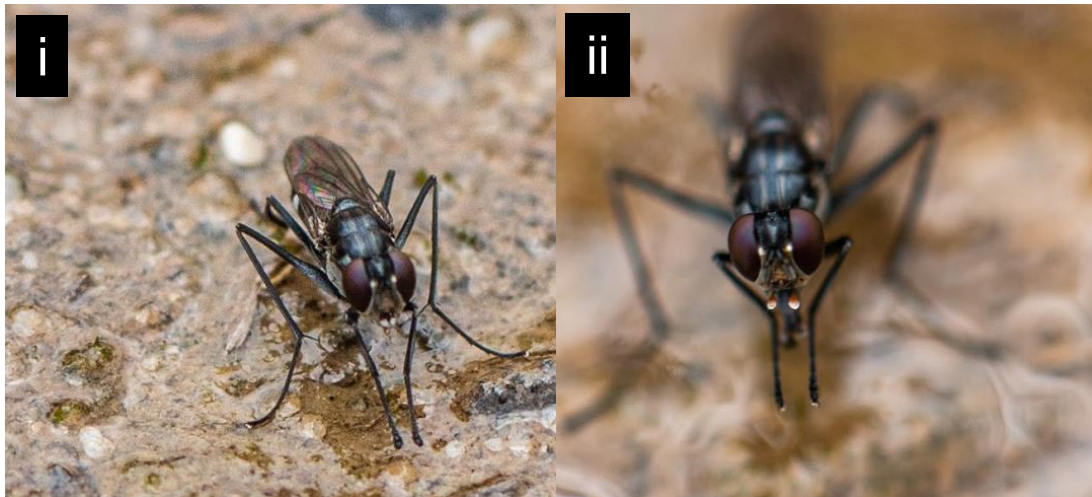

**Figure 3. i)** Elongated mid-legs and **ii)** iridescent spots seen on the head and facial palps of *Lispe sydneyensis*. The elongated mid-legs allow the male to position his entire body atop the back of the female (Figure 2.i). The iridescent spots may play an important role in sexual signalling, like the iridescent facial features involved in the sexual behaviour of *Lispe cana* (White et al. 2019). Photos were taken with a Canon 70D DSLR camera with a Canon EF 100mm f/2.8L lens. Photos credited to Nathan Butterworth.



154 **Table 1.** An ethogram describing the sexual behaviours displayed by male and female *L.*  
 155 *sydneyensis*. All behaviours were observed in at least three of the recorded observations  
 156 (Total N = 39). ‘M-F’ represents behaviours directed from a male to a female, ‘M-M from a  
 157 male to a male, and ‘F-M’ from a female to a male.

| Direction | Behaviour       | Description                                                                                                                                                |
|-----------|-----------------|------------------------------------------------------------------------------------------------------------------------------------------------------------|
| M-F       | Orienting       | Upon encountering a female, the male follows and attempts to position himself near her (within ~5 mm).                                                     |
|           | Circling        | The male rapidly encircles the female, usually in conjunction with mid-leg waving.                                                                         |
|           | Mid-leg waving  | Immediately prior to straddling the female, the male rapidly waves both of his mid-legs.                                                                   |
|           | Straddle-strike | The male quickly jumps on and off the back of the female, often several times immediately prior to straddling.                                             |
|           | Straddling      | The male sits atop the female, with a mid-leg on either side, which stabilises him while the female walks around.                                          |
|           | Wing-vibrating  | The male rapidly vibrates both of his wings while straddling the female.                                                                                   |
|           | Stroking        | While straddling the female, the male strokes her head and wings by shaking his fore-legs and hind-legs, respectively.                                     |
| M-M       | Bopping         | When two males encounter each other, they use their legs to repeatedly raise and then lower their bodies as they slowly approach each other.               |
|           | Fighting        | If neither male concedes during bopping, then one male initiates a frontal attack with the proboscis, sometimes resulting in a tug-of-war between the two. |
|           | Mid-leg waving  | The male rapidly waves his mid legs while facing towards a competing male.                                                                                 |
| F-M       | None observed*  | –                                                                                                                                                          |

158 \*There may be behaviours in this category; more observations are required.

159 The matador mud fly, *Lispe albimaculata*

160 This species was also commonly encountered. Both males and females exhibit white tips to  
 161 their wings, which seems to play an integral role in the male display (Figure 2.ii). The  
 162 courtship consists of a complex back and forth between the sexes, with both the male and the  
 163 female exhibiting several discrete behaviours (Table 2; Supplementary Material 2). In  
 164 sequential order, the male ‘orients’ towards the female, until within ~10 mm of her. The male  
 165 then ‘sneaks’ slowly closer to her and then remains perfectly still for a prolonged period  
 166 (anywhere from a few seconds to more than one minute), until the female rapidly spins to  
 167 ‘face-off’ with the male. He then flicks out one of his white-tipped wings and rapidly vibrates  
 168 it (although vibration is not always involved). This usually results in an immediate response  
 169 by the female, who will face the male and move towards the wing to inspect it. At this point,  
 170 the male either immediately attempts to force copulation or remains stationary for a period



171 (sometimes for several minutes) before doing so. In response to this copulation attempt,  
 172 females often become aggressive, resulting in a tussle between the two. We only observed  
 173 one interaction where the female eventually relented and accepted mating by the male. In  
 174 certain cases where the females are entirely non-receptive, they will lower their heads, spread  
 175 their wings, and sometimes stomp their mid-legs – which appears to deter males in most  
 176 circumstances. We observed no competitions or behavioural interactions between males.

177 **Table 2.** An ethogram describing the sexual behaviours displayed by male and female *L.*  
 178 *albimaculata*. All behaviours were observed in at least three of the recorded observations  
 179 (Total N = 16). ‘M-F’ represents behaviours directed from a male to a female, ‘M-M’ from a  
 180 male to a male, and ‘F-M’ from a female to a male.

| Direction | Behaviour        | Description                                                                                                                                                    |
|-----------|------------------|----------------------------------------------------------------------------------------------------------------------------------------------------------------|
| M-F       | Orienting        | Upon encountering a female, the male moves towards her until within ~10 mm.                                                                                    |
|           | Sneak            | Once within ~10 mm of the female, the male directly faces one side of her body, and inches forward at a slow pace, eventually remaining completely stationary. |
|           | Wing reveal      | Within ~5 mm of the female, and when completely stationary, the male quickly flicks out one wing (left or right) and in some cases rapidly vibrates it.        |
|           | Tackle           | Once noticed by the female, the male swiftly jumps towards the female, presumably to force copulation.                                                         |
| M-M       | None observed*   | –                                                                                                                                                              |
| F-M       | Wing spread      | In response to a male’s courtship attempt, the female positions her head towards the ground, spreading her wings while facing directly towards the male.       |
|           | Face-off         | In response to the presence of a sneaking male, the female rapidly spins to face the male, then remains stationary for several seconds.                        |
|           | Approach         | Following the face-off, the female slowly makes a frontal approach towards the male’s wing.                                                                    |
|           | Wing inspection  | The female sits directly next to the male’s revealed wing for several milliseconds, before turning around.                                                     |
|           | Mid-leg thumping | The female stomps both mid-legs while facing an approaching male.                                                                                              |
|           | Charge           | Upon encountering a male, the female makes an aggressive charge towards him.                                                                                   |

181 \*There may be behaviours in this category; more observations are required.

182 The hopping mud fly, *Lispe xenochaeta*

183 This species was only seen courting twice over the four days of filming. This was by far the  
 184 most difficult species to film, as there were numerous complex interactions between the sexes  
 185 (Table 3; Supplementary Material 3) and females would move frantically around the

186 environment. In sequential order, the male ‘orients’ towards the moving female, closely  
 187 following her before performing a series of sideways ‘hops’ (after each hop returning to his  
 188 initial position) occasionally followed by attempts to ‘tackle’ her. In response, the female  
 189 sometimes makes a frontal ‘charge’ towards the male. If the female is receptive, she  
 190 continues to move around the environment while ‘quivering’ and ‘spreading’ her wings to  
 191 reveal her black and white patterned abdomen. After several minutes of this back and forth,  
 192 the receptive female comes to a standstill at which point the male proceeds to ‘hold’ her  
 193 abdomen (Fig 2.iii) and begins ‘thumping’ his mid-legs and occasionally flicking his wings.  
 194 After a period (between 30 seconds and several minutes) of ‘thumping’ and ‘wing-flicking’,  
 195 the male attempts copulation. If the female is not receptive, she frantically shakes her body  
 196 until the male detaches. We observed no interactions between males.

197 **Table 3.** An ethogram describing the sexual behaviours displayed by male and female *L.*  
 198 *xenochaeta*. All behaviours were observed in both recorded observations (Total N = 2). ‘M-  
 199 F’ represents behaviours directed from a male to a female, ‘M-M from a male to a male, and  
 200 ‘F-M’ from a female to a male.

| Direction | Behaviour      | Description                                                                                                                     |
|-----------|----------------|---------------------------------------------------------------------------------------------------------------------------------|
| M-F       | Orienting      | Upon encountering a female, the male pursues and attempts to orient himself behind her.                                         |
|           | Wing extension | While orienting and facing the female, the male extends both wings.                                                             |
|           | Hopping        | Facing the female, the male performs several sideways hops, each time returning to his starting position before hopping again.  |
|           | Tackle         | The male swiftly flies or jumps toward the female, striking her with his body. This may be a preliminary attempt at copulation. |
|           | Holding        | The male positions himself behind the female and holds her abdomen or wings with his forelegs.                                  |
|           | Thumping       | While holding the female, the male vigorously thumps his mid-legs onto the ground.                                              |
|           | Wing flicking  | While holding and thumping, the male occasionally flicks both wings.                                                            |
| M-M       | None observed* | –                                                                                                                               |
| F-M       | Wing spread    | When pursued by a male, the female continues to move while spreading both wings to reveal her patterned abdomen.                |
|           | Wing quiver    | The female will rapidly quiver both wings, often while they are spread open.                                                    |
|           | Charge         | When being courted by a male, the female makes an aggressive charge directly towards the front of the male.                     |

201 \*There may be behaviours in this category; more observations are required.

202

203 DISCUSSION

204 The genus *Lispe* is found in every biogeographic region (Pont 2019) and most described  
205 species seem to exhibit some form of cursorial courtship (Werner and Pont 2006). These  
206 courtship displays consist of species-specific behavioural repertoires (Frantsevich and Gorb  
207 2006; Werner and Pont 2006; White et al. 2020) which suggests that sexual selection has  
208 played an important role in the evolution of the genus. Here, for the first time, we describe  
209 the pre-copulatory sexual behaviour of three Australian species: *L. sydneyensis*, *L.*  
210 *albimaculata* and *L. xenochaeta*. Considering that these species are common and easy to  
211 observe around ephemeral pools, they provide promising opportunities for future studies of  
212 evolution and behaviour.

213 The straddling mud fly, *Lispe sydneyensis*:

214 The most striking feature of this species is the elongation of the mid-legs in males and the  
215 associated straddling behaviour. The ‘straddling’ behaviour of *L. sydneyensis* is similar to the  
216 ‘holding’ in *L. xenochaeta* and ‘straddling’ seen in *L. cana* (White et al. 2019) – suggesting  
217 that straddling behaviours are widespread in *Lispe*. In the latter two species, males hold on to  
218 the back of the female with their forelegs, follow the female around, and only mount during  
219 copulation. The key difference in *L. sydneyensis* is that the male sits entirely atop the female  
220 and balances himself with the mid-legs while following her movements. Broadly, these  
221 ‘holding/straddling’ behaviours probably select for the ability of males to closely follow  
222 females and to guard her from nearby competitors prior to copulation. Such forms of  
223 precopulatory mate guarding are seen in many other insects including saproxylic parasitoid  
224 wasps (Hymenoptera: Ibalidae) (Kuramitsu et al. 2019) and black scavenger flies (Diptera:  
225 Sepsidae) (Pont and Meier 2002). Pre-copulatory mate guarding usually evolves in response  
226 to high levels of male-male competition, which may result from a male-biased sex ratio – as  
227 appears to be the case in both *L. sydneyensis* and *L. cana* (personal observation). However, it  
228 is also plausible that the male ‘straddling’ seen in *L. sydneyensis* is used to access the  
229 female’s viewpoint, as is the case in *L. cana* (White et al. 2020a). By aligning his field-of-  
230 view with the female’s, the male can determine when the female is viewing a background  
231 against which he will stand out, allowing him to time maximise the salience of his display. In  
232 support of this, there are iridescent spots on the head and facial palps of *L. sydneyensis*,  
233 which are only visible at certain angles (Figure 3i) and may act as visual signals, akin to the  
234 facial colouration seen in *Lispe cana* (White et al. 2020a). Notably, the males vigorously

235 vibrate their wings for the entire period they are atop the females. It is likely that this  
236 energetically costly performance produces aural cues, as in many *Drosophila* (Morley et al.  
237 2012). The duration for which a male can remain atop the female as well as vibrate his wings  
238 may also act as an honest signal of male quality. Lastly, we observed high levels of male-  
239 male competition whereby males would frequently engage in one-on-one ‘bopping’ which  
240 often led to fights. Male-male ‘bopping’ seems to allow males to assess the quality of their  
241 competitors before fighting – as not all instances of ‘bopping’ led to fighting – which  
242 suggests that males adjust their tactics according to their rival’s quality (Swierk and  
243 Langkilde 2013). Male-male competition is widespread in flies. Other notable examples  
244 include mushroom flies of the genus *Tapeigaster* (Diptera: Heleomyzidae) (McAlpine and  
245 Kent 1981) and antler flies of the genus *Protopiophila* (Diptera: Piophilidae). However, *L.*  
246 *sydneyensis* makes a particularly good system for investigating the intricacies of male-male  
247 competition, because the species is easy to find, film, collect in large numbers, and male-male  
248 encounters are frequent.

249 The matador mud fly, *Lispe albimaculata*:

250 This species is unique in both sexes having white tips to their wings, which the males display  
251 as they ‘wing-reveal’ during courtship. This white wing tip is probably a species-specific  
252 signal, as is seen in many other insects (Fordyce et al. 2002; Butterworth et al. 2019;  
253 Butterworth et al. 2021). The vibrations that the males exhibit during wing-reveal may be  
254 associated with acoustic cues similar to many other fly species (Benelli et al. 2012). Notably,  
255 female-male aggression is common during courtship, whereby females are often seen  
256 attacking or ‘charging’ towards males. Females also exhibit ‘wing-spread’ and ‘mid-leg  
257 thumping’ when males approach, which appear to be signals of rejection, similar to the wing-  
258 vibrations used by females of the yellow dung fly *Scatophaga stercoraria* to signal non-  
259 receptivity (Parker 1970). The use of the mid-legs during courtship seems to be an ancestral  
260 trait that has been adapted for various purposes in *Lispe*, such as ‘thumping’ in *L. xenochaeta*  
261 and ‘mid-leg waving’ in *Lispe sydneyensis*. Regarding the aggressive behaviours, males of *L.*  
262 *albimaculata* often try to force copulation, so it may be that female aggression evolved in  
263 response to male aggression (Arnqvist and Henriksson 1997; Hohmann and Fruth 2003;  
264 Maklakov et al. 2004). It is also plausible that female aggression occurs post-mating after  
265 receipt of a male’s ejaculate and a subsequent reduction in sexual receptivity, as in  
266 *Drosophila* (Bath et al. 2017; Bath et al. 2021), or that aggression is related to the increased  
267 risk of predator attack from male courtship attempts at undesirable times or locations (Hews



268 et al. 2004). Lastly, it is plausible that female aggression is an important component of  
269 courtship between the sexes, and a mechanism through which females can assess qualities of  
270 potential mates (Kralj-Fišer et al. 2013; DiRienzo et al. 2019). Female-male aggression has  
271 been reported in very few fly species, so *L. albimaculata* provides a useful system for  
272 investigating why such behaviours evolve.

273 The hopping mud fly, *Lispe xenochaeta*:

274 This species was only seen courting twice during the period of filming. Males are unique in  
275 that they perform side-ways ‘hops’ during courtship, which may act as a visual signal like the  
276 side-to-side dances exhibited by male *L. cana* (White et al. 2020). Also unique to this species  
277 is that while holding the females from behind, male *L. xenochaeta* vigorously ‘thump’ their  
278 mid-legs and ‘flick’ their wings, which almost certainly produces vibrational and aural cues,  
279 as in species of *Drosophila* (Fabre et al. 2012) and *Liriomyza* (Ge et al. 2018). This suggests  
280 that rather than solely as a form of mate guarding, ‘holding’ also serves to establish female  
281 receptivity in the lead-up to mating – this may also be true for *L. sydneyensis* and *L. cana*.  
282 Regarding the courtship behaviours of females, they seem to use the abdomen as a sexual  
283 signal, alternating between spread and closed wings to either hide or display their patterned  
284 abdomens. Most *Lispe* species have such patterned abdomens, and they are generally species-  
285 specific with differences in the shape and position of white markings (Pont 2019). It is  
286 possible that these abdominal patterns are involved as species- or sex-specific cues during  
287 courtship, as in many other invertebrates (Girard et al. 2011; Agrawal and Dickinson 2019).  
288 In one of the interactions, we observed that an unreceptive and aggressive female did not  
289 spread her wings to reveal her abdomen. As such, it seems plausible that the female ‘wing  
290 spread’, ‘wing quiver’, and abdomen display act as signals of female receptivity to the male.  
291 Importantly however, we only observed two interactions between males and females in this  
292 species, so there may be other inter- or intra-sexual interactions that occur. Regarding female  
293 aggression, similarly to *L. albimaculata*, female *L. xenochaeta* can be aggressive towards  
294 males – charging and attacking them during courtship events. This may be a response to male  
295 aggression and forced copulation attempts – whereby males repeatedly ‘tackle’ females  
296 during courtship. As mentioned above, there are also various other reasons that female-male  
297 aggression can occur, including female mate-assessment, or following the reception of male  
298 ejaculate, and *L. xenochaeta* provides ample opportunity for testing such hypotheses.

299 Overall, these remarkable species further highlight the many behavioural complexities that  
300 are expressed by calyptrate flies during mating. Due to the ease with which they can be  
301 observed and collected, *Lispe* provide promising opportunities to investigate behavioural and  
302 evolutionary questions – and there is much to be gained from investigating the underpinnings  
303 of male-male competition and female-male aggression in the species highlighted here. Given  
304 that *Lispe* species can be easily found worldwide and exhibit wildly diverse behaviours, we  
305 encourage researchers to consider them as model species in their own studies of animal  
306 evolution, behaviour, and ecology.

#### 307 SUPPLEMENTARY MATERIAL

308 Supplementary Material 1 – Courtship behaviour of *Lispe sydneyensis*:

309 <https://youtu.be/rIAJY7p2ql0>

310 Supplementary Material 2 – Courtship behaviour of *Lispe albimaculata*:

311 <https://youtu.be/k6BKLK4Dkwc>

312 Supplementary Material 3 – Courtship behaviour of *Lispe xenochaeta*:

313 <https://youtu.be/gscgzAqqFYI>

#### 314 REFERENCES

- 315 Agrawal S, Dickinson MH (2019) The effects of target contrast on *Drosophila* courtship.  
316 *Journal of Experimental Biology* 222:jeb203414
- 317 Arnqvist G, Henriksson S (1997) Sexual cannibalism in the fishing spider and a model for the  
318 evolution of sexual cannibalism based on genetic constraints. *Evolutionary Ecology*  
319 11:255-273.
- 320 Bath E, Bowden S, Peters C, Reddy A, Tobias JA, Easton-Calabria E, Seddon N, Goodwin  
321 SF, Wigby S (2017) Sperm and sex peptide stimulate aggression in female  
322 *Drosophila*. *Nature Ecology and Evolution* 1:0154.
- 323 Bath E, Edmunds D, Norman J, Atkins C, Harper L, Rostant WG, Chapman T, Wigby S,  
324 Perry J (2021) Sex ratio and the evolution of aggression in fruit flies. *Proceedings of*  
325 *the Royal Society B* 299:20203053
- 326 Benelli G, Canale A, Bonsignori G, Ragni G, Stefanini C, Raspi A (2012) Male wing  
327 vibration in the mating behavior of the olive fruit fly *Bactrocera oleae* (Rossi)  
328 (Diptera: Tephritidae). *Journal of Insect Behavior* 25:590-603.
- 329 Bonduriansky R, Brooks RJ (1999) Why do male antler flies (*Protophilia litigata*) fight? The  
330 role of male combat in the structure of mating aggregations on moose antlers.  
331 *Ethology Ecology and Evolution* 11:287-301.
- 332 Butterworth NJ, Byrne PG, Wallman JF (2019) The blowfly waltz: Field and laboratory  
333 observations of novel and complex dipteran courtship behavior. *Journal of Insect*  
334 *Behavior* 32:109-119.
- 335 Butterworth NJ, White TE, Byrne PG, Wallman JF (2021) Love at first flight: Wing  
336 interference patterns are species-specific and sexually dimorphic in blowflies. *Journal*  
337 *of Evolutionary Biology* 34:558-570.

- 338 DiRienzo N, Bradley CT, Smith CA, Dornhaus A (2019) Bringing down the house: male  
339 widow spiders reduce the webs of aggressive females more. *Behavioural Ecology and*  
340 *Sociobiology* 73:1.
- 341 Fabre C, Hedwig B, Conduit G, Lawrence PA, Goodwin SF, Casal J (2012) Substrate-borne  
342 vibratory communication during courtship in *Drosophila melanogaster*. *Current*  
343 *Biology* 22:2180-2185
- 344 Fogaça JM, de Carvalho CJB (2018) Neotropical *Lispe* (Diptera: Muscidae): notes,  
345 redescriptions and key to species. *Journal of Natural History* 52:2147-2184.
- 346 Fordyce JA, Nice CC, Forister ML, Shapiro AM (2002) The significance of wing pattern  
347 diversity in the Lycaenidae: mate discrimination by two recently diverged species.  
348 *Journal of Evolutionary Biology* 15:871-879.
- 349 Frantsevich L, Gorb S (2006) Courtship dances in the flies of the genus *Lispe* (Diptera:  
350 Muscidae): from the fly's viewpoint. *Archives of Insect Biochemistry* 62:26-42.
- 351 Ge J, Wie J, Zhang D, Hu C, Zheng D, Kang L (2018) Pea leafminer *Liriomyza huidobrensis*  
352 (Diptera: Agromyzidae) uses vibrational duets for efficient sexual communication.  
353 *Insect Science* 26:510-522
- 354 Girard M, Kasumovic M, Elias D (2011) Multi-modal courtship in the peacock spider,  
355 *Maratus volans* (O.P.-Cambridge, 1874). *PLOS ONE* 6:e25390
- 356 Hews DK, Castellano M, Hara E (2004) Aggression in females is also lateralized: left-eye  
357 bias during aggressive courtship rejection in lizards. *Animal Behaviour* 68:1201-1207
- 358 Hohmann G, Fruth B (2003) Intra- and inter-sexual aggression by bonobos in the context of  
359 mating. *Behaviour* 140:1389-1413.
- 360 Kralj-Fišer S, Sanguino Mostajo GA, Preik O, Pekár S, Schneider JM (2013) Assortative  
361 mating by aggressiveness type in orb weaving spiders. *Behavioral Ecology* 24:824-  
362 831.
- 363 Kuramitsu K, Yooboon T, Tomatsuri M, Yamada H, Yokoi T (2019) First come, first served:  
364 precopulatory mate-guarding behavior and male-male contests by a hymenopteran  
365 saproxylic parasitoid. *The Science of Nature* 106:23.
- 366 Kutty SN, Pape T, Wiegmann BM, Meier R (2010) Molecular phylogeny of the Calypttratae  
367 (Diptera: Cyclorhapha) with an emphasis on the superfamily Oestroidea and the  
368 position of Mystacinobiidae and McAlpine's fly. *Systematic Entomology* 35:614-635
- 369 Land MF, Collett TS (1974) Chasing behaviour of houseflies (*Fannia canicularis*). *Journal of*  
370 *Comparative Physiology* 89:331-357.
- 371 Maklakov AA, Bilde T, Lubin Y (2004) Sexual selection for increased male body size and  
372 protandry in a spider. *Animal Behaviour* 68:1041-1048.
- 373 McAlpine DK, Kent DS (1981) Systematics of *Tapeigaster* (Diptera: Heleomyzidae) with  
374 notes on biology and larval morphology. *Proceeding of the Linnean Society of New*  
375 *South Wales* 106:33-58.
- 376 Morley EL, Steinmann T, Casas J, Robert D (2012) Directional cues in *Drosophila*  
377 *melanogaster* audition: structure of acoustic flow and inter-antennal velocity  
378 differences. *Journal of Experimental Biology* 215:2405-2413.
- 379 Parker GA (1970) The reproductive behaviour and the nature of sexual selection in  
380 *Scatophaga stercoraria* L. (Diptera: Scatophagidae). *Behaviour* 37:140-168.
- 381 Pont AC (2019) Studies on the Australian Muscidae (Diptera). VIII. The genus *Lispe*  
382 *Latreille, 1797*. *Zootaxa* 4557:001-232.
- 383 Pont AC, Meier R (2002) The Sepsidae (Diptera) of Europe. *Fauna Entomologica*  
384 *scandinavica*. Brill, Leiden, The Netherlands
- 385 Spofford M, Kurczewski F (1985) Courtship and mating behavior of *Phrosinella aurifacies*  
386 *Downes* (Diptera: Sarcophagidae: Miltogramminae). *Proceedings of the*  
387 *Entomological Society of Washington* 87:273-282.

- 388 Swierk L, Langkilde T (2013) Sizing-up the competition: Factors modulating male display  
389 behavior during mate competition. *Ethology* 119:948-959
- 390 Vihrev N (2011) Review of the Palaearctic members of the *Lispe* tentaculate species-group  
391 (Diptera, Muscidae): revised key, synonymy and notes on ecology. *Zookeys* 84:59-70.
- 392 Werner D, Pont AC (2006) The feeding and reproductive behaviour of the Limnophorini  
393 (Diptera: Muscidae). *Proceedings of the International Symposium of Simuliidae*  
394 14:79-114.
- 395 White TE, Vogel-Ghibely N, Butterworth NJ (2020a) Flies exploit predictable perspectives  
396 and backgrounds to enhance iridescent signal salience and mating success. *The*  
397 *American Naturalist* 195:733-742
- 398 White TE, Latty T (2020b) Flies improve the salience of iridescent sexual signals by  
399 orienting toward the sun. *Behavioral Ecology* 31:1401-1409
- 400 Zhang D, Wang Q, Liu X, Li K (2013) Sensilla on antenna and maxillary palp of predaceous  
401 fly, *Lispe neimongola* Tian et Ma (Diptera: Muscidae). *Micron* 49:33-39.
